# Supplementary material
Source: PubMed Central journal article supplement (PMC1342633)

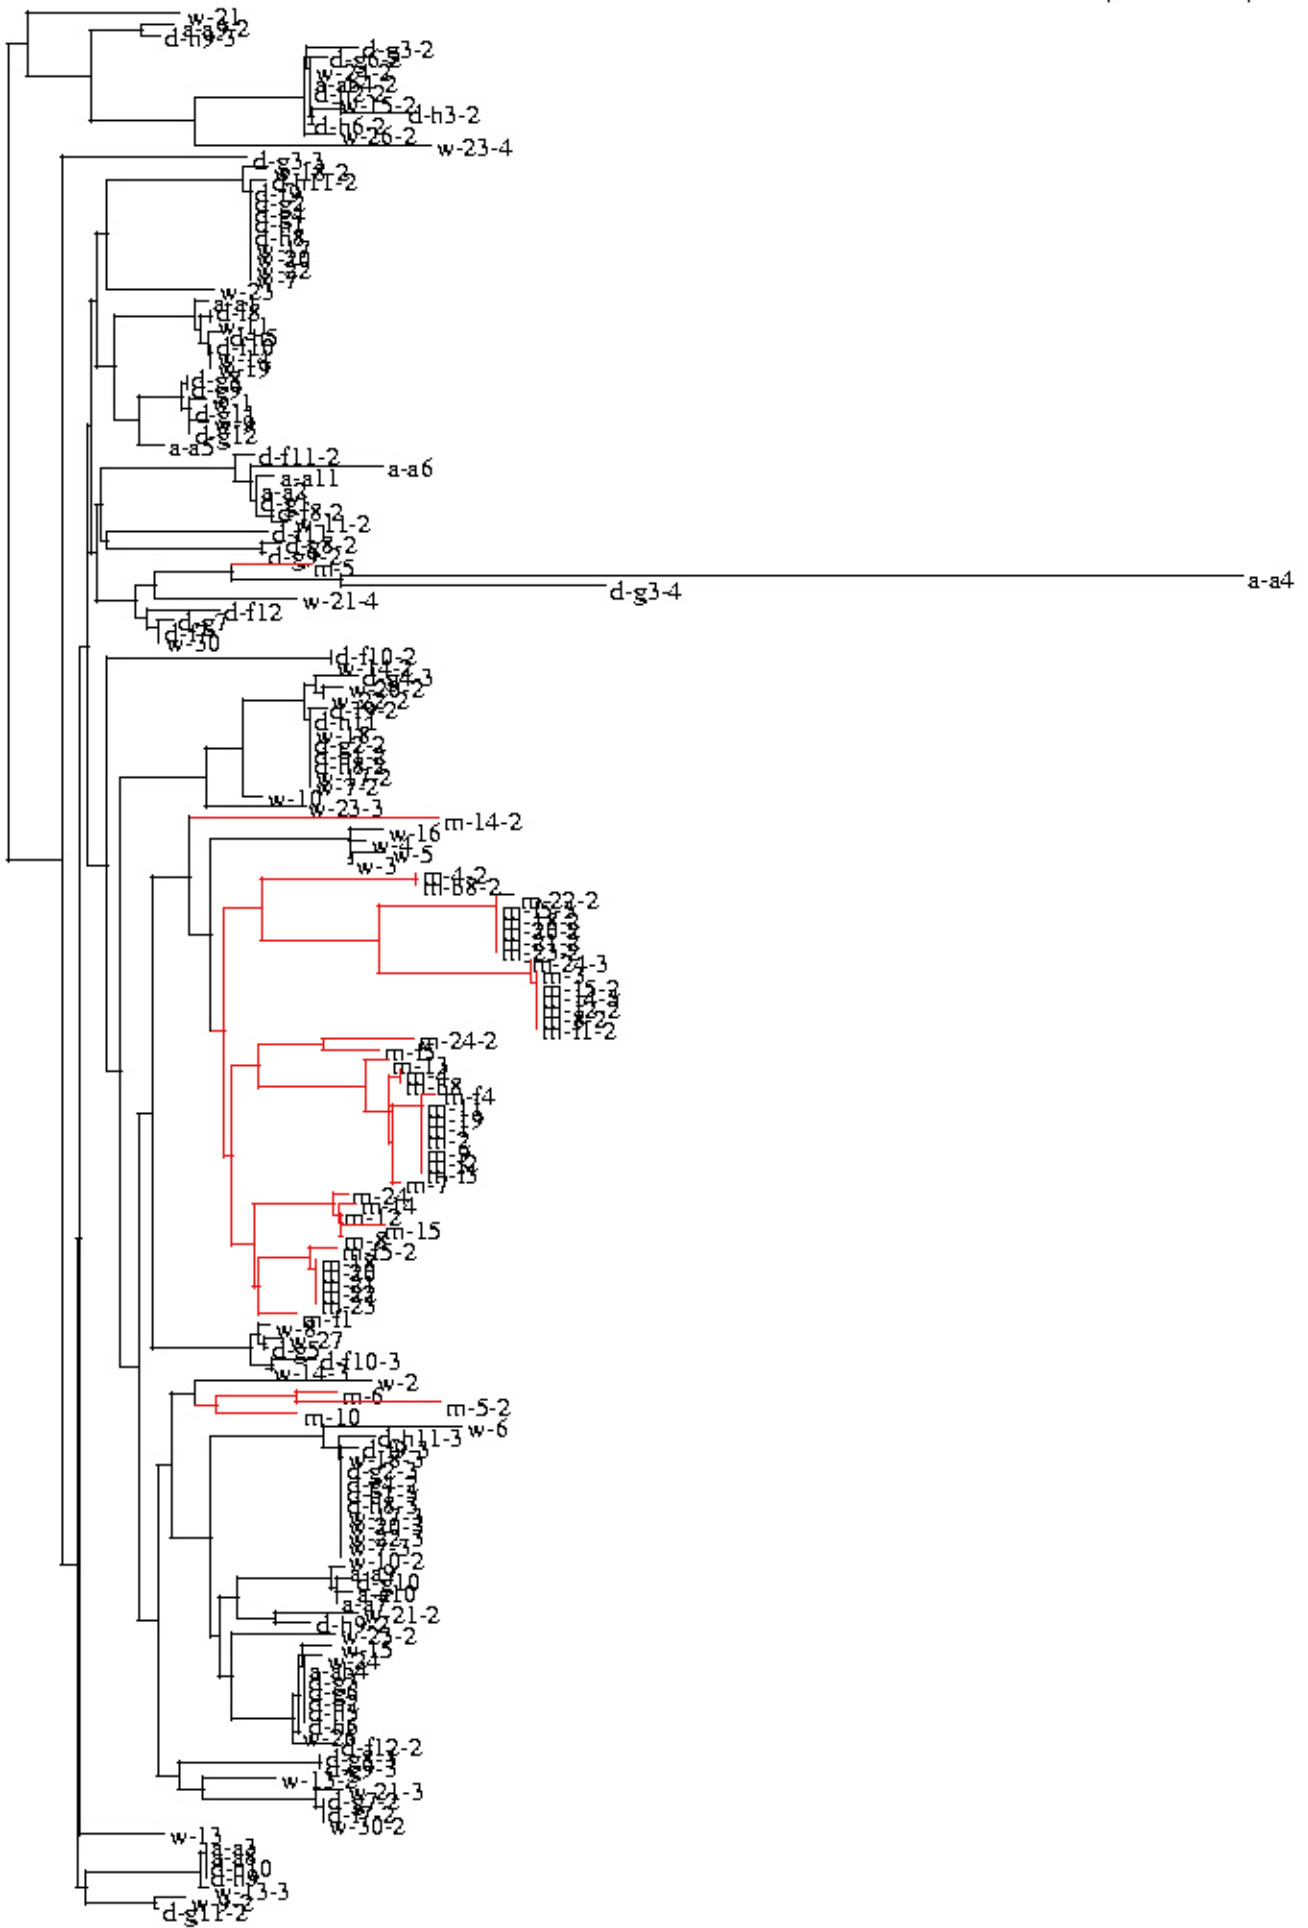

Supplement: pgen.0010079.sg002.pdf [file pgen.0010079.sg002.pdf]
